# Supplementary material for: Undergraduate STEM Majors on and off the Pre-Med/Health Track: A STEM Identity Perspective
Source: Atypon-hosted journal article supplement (doi:10.1187/cbe.20-12-0281), 2021-04-15
Supplement: combinedsupmats.pdf [file combinedsupmats.pdf]

# Supplemental Material

*CBE—Life Sciences Education*

Dou *et al.*

**Table S1. Correlations amongst our four primary variables.**

|                               | <b>Identity</b> | <b>Interest</b> | <b>Recognition</b> |
|-------------------------------|-----------------|-----------------|--------------------|
| <b>Interest</b>               | 0.61            |                 |                    |
| <b>Recognition</b>            | 0.66            | 0.41            |                    |
| <b>Performance-Competence</b> | 0.49            | 0.45            | 0.52               |
